# Supplementary figures and images for: A curtain purification system based on a rabbit fur-based rotating triboelectric nanogenerator for efficient photocatalytic degradation of volatile organic compounds
Source: Royal Society of Chemistry journal article supplement (doi:10.1039/d3nr00507k), 2023-01-01

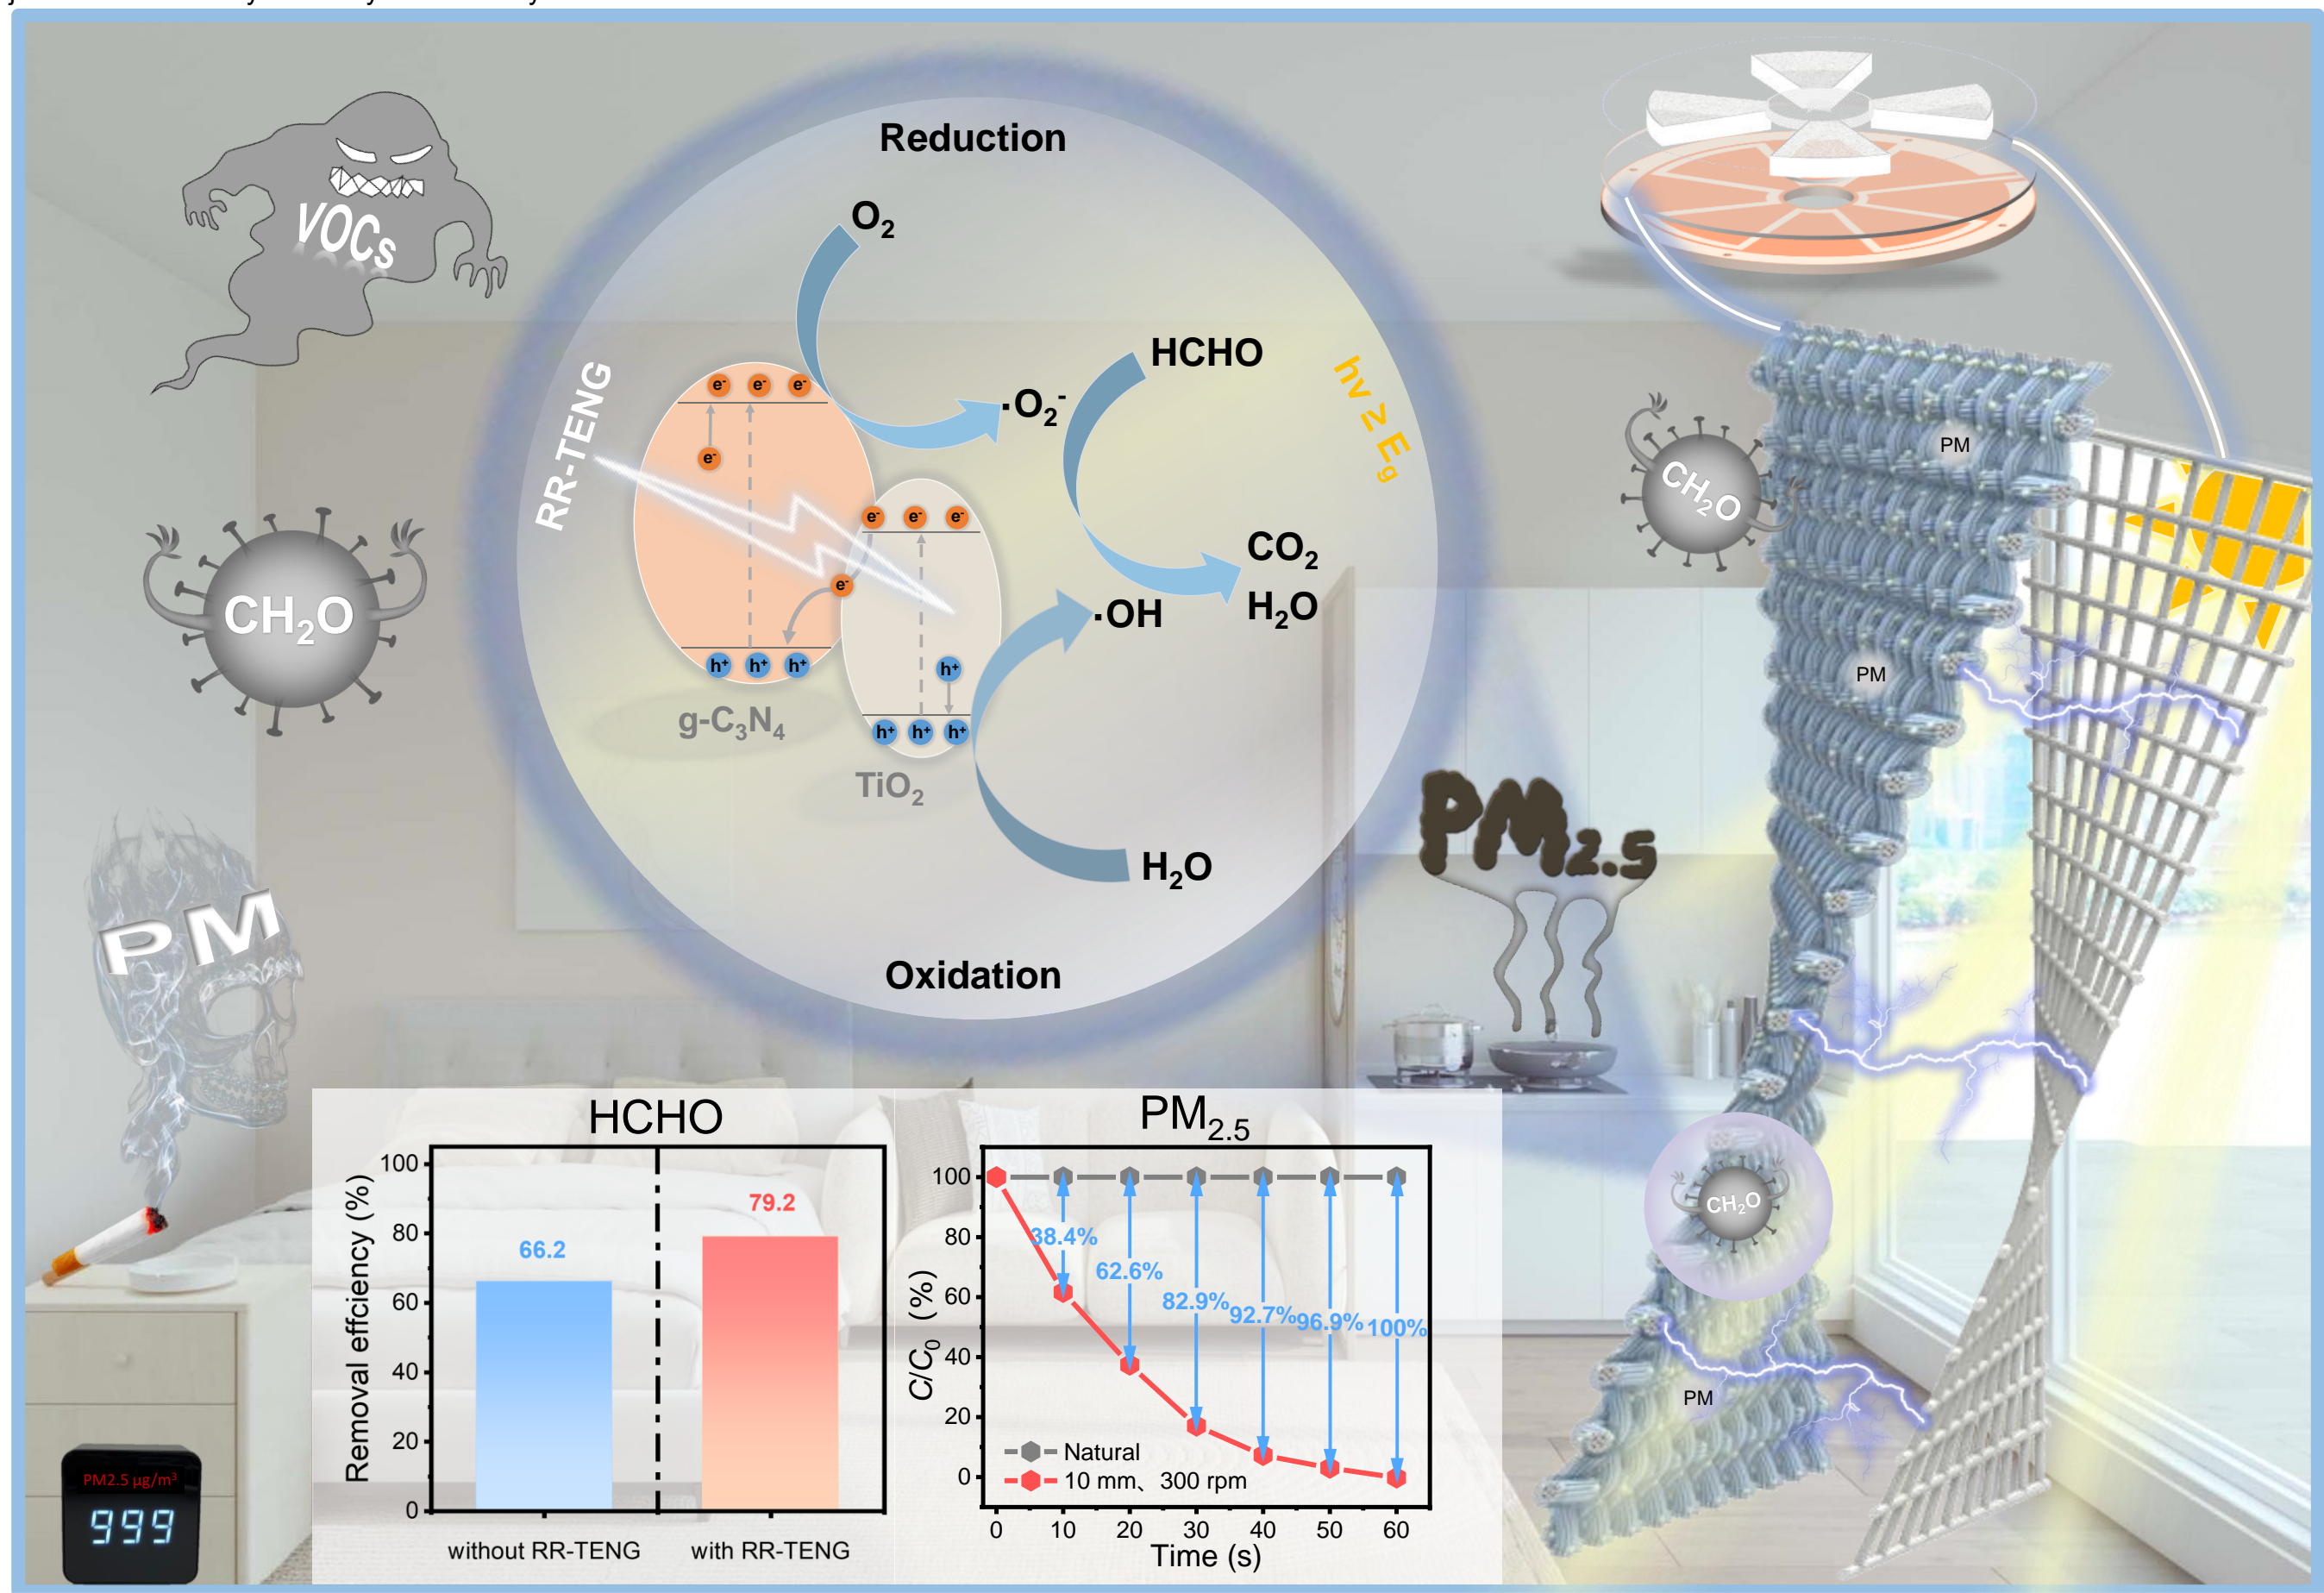

Supplement: d3nr00507k1.pdf [file d3nr00507k1.pdf]
